# Supplementary material for: Efficacy and feasibility of pharmacoscopy-guided treatment for acute myeloid leukemia patients who have exhausted all registered therapeutic options
Source: PubMed Central journal article supplement — Haematologica. 2023 Jul 13;109(2):617–21. doi: 10.3324/haematol.2023.283224 (PMC10828754; doi:10.3324/haematol.2023.283224), 2023-07-13
Supplement: 2023_283224_SCHMID_SUPPL.pdf [file 2023_283224_SCHMID_SUPPL.pdf]

# Efficacy and feasibility of pharmacoscopy-guided treatment for acute myeloid leukemia patients who have exhausted all registered therapeutic options

Jonas Andreas Schmid,<sup>1\*</sup> Yasmin Festl,<sup>2\*</sup> Yannik Severin,<sup>2\*</sup> Ulrike Bacher,<sup>3</sup> Marie-Noëlle Kronig,<sup>4</sup> Berend Snijder<sup>2#</sup> and Thomas Pabst<sup>4#</sup>

Correspondence:

B. SNIJDER - [snijder@imsb.biol.ethz.ch](mailto:snijder@imsb.biol.ethz.ch)

<sup>1</sup>Faculty of Medicine University of Bern, Bern; <sup>2</sup>Department of Biology, Institute of Molecular Systems Biology, ETH Zürich, Zürich;

<sup>3</sup>Department of Hematology, Inselspital, University Hospital Bern, University of Bern, Bern and <sup>4</sup>Department of Medical Oncology, Inselspital, University Hospital Bern, University of Bern, Bern, Switzerland

<https://doi.org/10.3324/haematol.2023.283224>

Received: March 27, 2023.

Accepted: July 6, 2023.

Early view: July 13, 2023.

©2024 Ferrata Storti Foundation

Published under a CC BY-NC license 

\*JAS, YF and YS contributed equally as first authors.

#BS and TB contributed equally as senior authors.

|                                                                                         |                   |
|-----------------------------------------------------------------------------------------|-------------------|
| Waiting time for results, days                                                          |                   |
| Median (IQR)                                                                            | 5.0 (4.0-6.0)     |
| No. of recommended compounds per patient                                                |                   |
| Median (IQR)                                                                            | 5.5 (4.3-8.8)     |
| Therapy choice per patient (No. of patients and share of intention to treat population) |                   |
| Recommendation received                                                                 | 17 (56.7%)        |
| Recommendation not received                                                             | 13 (43.3%)        |
| AML specific therapy based on in-house guidelines                                       | 9 (30.0%)         |
| Best supportive care                                                                    | 4 (13.3%)         |
| Duration from recommendation to administration of therapy (days)                        |                   |
| Median (IQR)                                                                            | 11.0 (6.0-24.0)   |
| Duration of therapy administration (days, all patients)                                 |                   |
| Median (IQR)                                                                            | 65.5 (26.5-183.8) |
| Duration of therapy administration (days, recommended therapy)                          |                   |
| Median (IQR)                                                                            | 69.0 (21.0-171.0) |
| Duration of therapy administration (days, other AML specific therapy)                   |                   |
| Median (IQR)                                                                            | 47.0 (40.0-214.0) |

**Table S1: Overview of *ex vivo* drug screen and treatment choice**

IQR: Interquartile range, No.: Numbers

| Patient subgroup                  |                                      | Pharmacoscopy based treatment regimen | Treatment regimen based on in-house guidelines | Treatment regimen with above median i-PCY score | Treatment regimen with below median i-PCY score |
|-----------------------------------|--------------------------------------|---------------------------------------|------------------------------------------------|-------------------------------------------------|-------------------------------------------------|
| Age at start of the study (Years) | Median                               | 67                                    | 72                                             | 70.5                                            | 67.5                                            |
|                                   | IQR                                  | 65-73                                 | 67-73                                          | 66.25-74.5                                      | 65.75-73                                        |
|                                   | p value                              | 0.0975                                |                                                | 0.7673                                          |                                                 |
| Gender                            | Number and share of female patients  | 8 (47.06%)                            | 4 (30.77%)                                     | 5 (35.71%)                                      | 9 (43.75%)                                      |
|                                   | Number and share of male patients    | 9 (52.94%)                            | 9 (69.23%)                                     | 9 (64.29%)                                      | 9 (56.25%)                                      |
|                                   | p value                              | 0.5986                                |                                                | 0.9405                                          |                                                 |
| ELN Risk Group                    | Favourable (number and share)        | 1 (5.88%)                             | 3 (23.08%)                                     | 2 (14.29%)                                      | 2 (12.5%)                                       |
|                                   | p value                              | 0.4060                                |                                                | 1.0000                                          |                                                 |
|                                   | Intermediate (number and share)      | 6 (35.29%)                            | 4 (30.77%)                                     | 5 (35.71%)                                      | 5 (31.25%)                                      |
|                                   | p value                              | 1.0000                                |                                                | 1.0000                                          |                                                 |
|                                   | Adverse (number and share)           | 10 (58.82%)                           | 6 (46.15%)                                     | 7 (50%)                                         | 9 (56.25%)                                      |
| p value                           | 0.7489                               |                                       | 1.0000                                         |                                                 |                                                 |
| No. of previous treatent lines    | Median                               | 3                                     | 2                                              | 3                                               | 2                                               |
|                                   | IQR                                  | 1-4                                   | 1-2                                            | 1-3.75                                          | 1-2.25                                          |
|                                   | p value                              | 0.0528                                |                                                | 0.2828                                          |                                                 |
| Sample Type                       | Bone marrow (number and share)       | 6 (35.29%)                            | 8 (61.54%)                                     | 6 (42.86%)                                      | 8 (50.00%)                                      |
|                                   | Peripheral sample (number and share) | 11 (64.71%)                           | 5 (38.46%)                                     | 8 (57.14%)                                      | 8 (50.00%)                                      |
|                                   | p value                              | 0.2685                                |                                                | 0.7300                                          |                                                 |

Table S2: Subgroup demographics

| Subgroup                               | No. of screening instances with a known response in the bone marrow (n=25) | Response  |           |           |           |
|----------------------------------------|----------------------------------------------------------------------------|-----------|-----------|-----------|-----------|
|                                        |                                                                            | CR        | PR        | SD        | R         |
| Treatment based on Pharmacoscopy       | 17                                                                         | 6 (35.3%) | 2 (11.8%) | 2 (11.8%) | 7 (41.2%) |
| Treatment based on in-house guidelines | 8                                                                          | 2 (25.0%) | 0 (0.0%)  | 1 (12.5%) | 5 (62.5%) |
| i-PCY score of regimen > median        | 11                                                                         | 5 (45.5%) | 1 (9.1%)  | 2 (18.2%) | 3 (27.3%) |
| i-PCY score of regimen < median        | 14                                                                         | 3 (21.4%) | 1 (7.1%)  | 1 (7.1%)  | 9 (64.3%) |

**Table S3: Overall response by subgroups**

CR: Complete remission, PR: Partial remission, SD: Stable disease, R: Refractory, No.: Number
